## 9 **ABSTRACT**

10 The gastrointestinal colonizer *Enterococcus faecium* is a leading cause of hospital-acquired  
11 infections. Multidrug-resistant (MDR) *E. faecium* are particularly concerning for infection  
12 treatment. Previous comparative genomic studies revealed that subspecies referred to as Clade  
13 A and Clade B exist within *E. faecium*. MDR *E. faecium* belong to Clade A, while Clade B  
14 consists of drug-susceptible fecal commensal *E. faecium*. Isolates from Clade A are further  
15 grouped into two sub-clades, A1 and A2. In general, Clade A1 isolates are hospital epidemic  
16 isolates whereas Clade A2 isolates are isolates from animals and sporadic human infections.  
17 Such phylogenetic separation indicates that reduced gene exchange occurs between the  
18 clades. We hypothesize that endogenous barriers to gene exchange exist between *E. faecium*  
19 clades. Restriction-modification (R-M) systems are such barriers in other microbes. We utilized  
20 bioinformatics analysis coupled with second generation and third generation deep sequencing  
21 platforms to characterize the methylome of two representative *E. faecium* strains, one from  
22 Clade A1 and one from Clade B. We identified a Type I R-M system that is Clade A1-specific, is  
23 active for DNA methylation, and significantly reduces transformability of Clade A1 *E. faecium*.  
24 Based on our results, we conclude that R-M systems act as barriers to horizontal gene  
25 exchange in *E. faecium* and propose that R-M systems contribute to *E. faecium* subspecies  
26 separation.

27

## 28 **IMPORTANCE**

29 *Enterococcus faecium* is a leading cause of hospital-acquired infections around the world.  
30 Rising antibiotic resistance in certain *E. faecium* lineages leaves fewer treatment options. The  
31 overarching aim of the attached work was to determine whether restriction-modification (R-M)  
32 systems contribute to the structure of the *E. faecium* species, wherein hospital-epidemic and  
33 non-hospital-epidemic isolates have distinct evolutionary histories and highly resolved clade

34 structures. R-M provides bacteria with a type of innate immunity to horizontal gene transfer  
35 (HGT). We identified a Type I R-M system that is enriched in the hospital-epidemic clade and  
36 determined that it is active for DNA modification activity and significantly impacts HGT. Overall,  
37 this work is important because it provides a mechanism for the observed clade structure of *E.*  
38 *faecium* as well as a mechanism for facilitated gene exchange among hospital-epidemic *E.*  
39 *faecium*.

40

## 41 INTRODUCTION

42 *Enterococcus faecium* is a Gram-positive opportunistic pathogen that normally resides in the  
43 gastrointestinal tracts of humans and other animals (1, 2). *E. faecium* can cause life-threatening  
44 infections such as endocarditis and is among the leading causes of catheter-associated  
45 bloodstream and urinary tract infections in clinical settings (3).

46

47 Previous comparative genomic studies revealed that subspecies exist within *E. faecium* (4-7).  
48 Different names have been used by different groups to describe these clades; in this study, we  
49 use the Clade A/B nomenclature. Generally speaking, MDR *E. faecium* belong to Clade A, while  
50 Clade B consists of drug-susceptible fecal commensal *E. faecium* (8). Clade A is further split  
51 into two subclades, A1 and A2, with hospital-endemic strains generally clustering in Clade A1  
52 and sporadic infection isolates and animal isolates generally clustering in Clade A2 (8). Specific  
53 phenotypes and genomic features are enriched in Clade A1 isolates relative to Clade A2 and B  
54 isolates (8). Specifically, Clade A1 isolates have significantly higher mutation rates, larger  
55 overall genome sizes including a larger core genome, and possess more mobile elements. On  
56 the other hand, Clade A2 possesses a larger pan-genome than Clade A1 and B, possibly  
57 reflective of the broader host origins of these strains. Given that Clade A and Clade B strains  
58 would be expected to co-mingle in certain environments (for example, in hospital and municipal  
59 sewage), the phylogenetic separation among the *E. faecium* clades suggests that they are not  
60 sharing genetic information freely because of endogenous barriers to genetic exchange.

61

62 Horizontal gene transfer (HGT) is the exchange of genetic material between cells rather than  
63 the vertical inheritance of genetic material from a parental cell. Bacteria can encode genome  
64 defense mechanisms that can act in opposition to HGT. Two examples of these mechanisms  
65 are clustered regularly interspaced short palindromic repeats (CRISPR) and associated proteins  
66 (CRISPR-Cas) systems and restriction-modification (R-M) systems. CRISPR-Cas is a dynamic

67 immune system that utilizes sequence complementarity between self (CRISPR RNAs) and  
68 foreign nucleic acid to carry out its restrictive function, whereas R-M discriminates self from  
69 foreign DNA by DNA methylation patterns. If the *E. faecium* clades encode different defense  
70 mechanisms, they may not exchange genetic information freely, thereby facilitating and  
71 maintaining phylogenetic separation. However, little is known about CRISPR-Cas and R-M in *E.*  
72 *faecium*. Genomic analysis suggests that these systems could contribute to the observed clade  
73 structure of *E. faecium*. For example, CRISPR-Cas systems have been identified exclusively in  
74 Clade B *E. faecium* and in sporadic Clade A-Clade B recombinant strains (8). For R-M, a  
75 predicted methyl-directed restriction endonuclease (REase) is enriched in Clade A2 and B *E.*  
76 *faecium* genomes relative to Clade A1 genomes (8).

77

78 Here, we focused on R-M systems and their roles in regulating gene exchange in *E. faecium*  
79 because little is known about R-M defense in this species. Moreover, there is precedent in the  
80 literature for R-M systems contributing to bacterial clade structure, as has been observed in  
81 *Burkholderia* (9) and *Neisseria* (10). Our overarching hypothesis is that the *E. faecium* clades  
82 encode different R-M systems, thereby inhibiting genetic exchange between them. In general,  
83 R-M systems are composed of cognate methyltransferase (MTase) and REase activities and  
84 are classified into different types based on the specific number and types of enzymes in the  
85 system, as well as characteristics such as methylation type and pattern, cofactor requirement,  
86 and restriction activity (11). A MTase recognizes specific sequences in the bacterial genome  
87 and transfers a methyl group to either an adenine or a cytosine, resulting in 6-methyladenine  
88 (m6A), 4-methylcytosine (m4C), or 5-methylcytosine (m5C). A REase may recognize the same  
89 sequence as a MTase and cleave that region if the sequence is unmethylated (or in some  
90 cases, if methylated). With the activities of MTases and REases, bacteria can use R-M to  
91 impede entry of non-self DNA.

92

93 In this study, we used single-molecule real-time (SMRT) sequencing and whole genome  
94 bisulfite sequencing to characterize the methylomes of representative *E. faecium* strains from  
95 Clade A1 (*E. faecium* 1,231,502; or Efm502) and Clade B (*E. faecium* 1,141,733; or Efm733).  
96 Two unique m6A methylation patterns were identified, one in each strain. These patterns were  
97 asymmetric and bipartite, which is characteristic of Type I R-M methylation motifs (12).  
98 Bioinformatic analyses were performed to identify candidate genes responsible for the  
99 methylation. A unique Type I R-M system is encoded by each strain. We have named these  
100 systems Efa502I (for Efm502) and Efa733I (for Efm733). Expression of these candidate  
101 systems in *E. faecalis* heterologous hosts followed by SMRT sequencing confirmed that they  
102 are responsible for the methylation patterns observed in Efm502 and Efm733. A functional  
103 analysis was performed in order to assess the abilities of these systems to reduce *E. faecium*  
104 HGT by transformation. In a comparative analysis among 73 *E. faecium* genomes, we found  
105 that Efa502I is significantly enriched among Clade A1 isolates, while the Type I R-M system of  
106 Efm733 appears to be strain-specific. Overall, this study is a first step towards understanding  
107 the role of R-M in regulating HGT in *E. faecium* and the potential for R-M as one mechanism for  
108 the clade structure of *E. faecium*.

109

## 110 **METHODS**

111 **Bacterial strains and growth conditions.** The strains used in this study are shown in Table 1.  
112 All enterococci were grown in Brain Heart Infusion (BHI) broth or agar at 37°C, unless otherwise  
113 stated. *Escherichia coli* strains were grown in Luria Broth (LB) at 37°C and with shaking at 225  
114 rpm unless otherwise stated. Antibiotic concentrations for enterococcal strains were as follows:  
115 rifampin, 50 µg/mL; fusidic acid, 25 µg/mL; spectinomycin, 500 µg/mL; streptomycin, 500 µg/mL;  
116 chloramphenicol, 15 µg/mL. Antibiotic concentrations for *E. coli* strains were as follows:  
117 chloramphenicol, 15 µg/mL; ampicillin, 100 µg/mL. All REases were purchased from New  
118 England Biolabs (NEB) and used per the manufacturer's instructions. PCR was performed using

119 Taq polymerase (NEB) or Phusion (Fisher). Sanger sequencing to validate all genetic  
120 constructs was performed at the Massachusetts General Hospital DNA Core facility (Boston,  
121 MA).

122

123 **Isolation of genomic DNA.** Enterococcal strains were cultured overnight in BHI broth prior to  
124 genomic DNA (gDNA) extraction. The extraction was performed using a Qiagen Blood and  
125 Tissue DNeasy Kit using a previously published protocol (13). To isolate *E. coli* gDNA, bacteria  
126 were grown overnight in LB broth prior to extraction using either the Blood and Tissue DNeasy  
127 kit (Qiagen) or the UltraClean Microbial DNA Isolation Kit (Qiagen) per the manufacturer's  
128 instructions.

129

130 **SMRT sequencing and methylome detection.** SMRT sequencing was performed by the  
131 Johns Hopkins Medical Institute Deep Sequencing and Microarray Core. After sequencing, the  
132 reads were assembled into contigs and analyzed using the RS modification and motif detection  
133 protocol in SMRT portal v1.3.3. An *in silico* control was used as a methylation baseline. SMRT  
134 sequencing in *E. faecalis* expressing Efa502I or Efa733I was performed by the University of  
135 Michigan sequencing core facility. Reads were mapped to the *E. faecalis* OG1RF reference  
136 sequence (GenBank accession number NC\_017316), and the methylation motifs were detected  
137 using the RS modification and motif detection protocol in SMRT portal v.2.3.2.

138

139 **Bioinformatic analysis of R-M systems in eight *E. faecium* genomes.** The entire protein  
140 complement for eight previously sequenced *E. faecium* isolates (14) was analyzed. To identify  
141 potential MTases, the REBASE Gold Standard list (15) was used as a reference. This list is  
142 comprised of biochemically verified MTases and REases. Each protein sequence from *E.*  
143 *faecium* genomes was analyzed using BlastP against the REBASE Gold Standard list. The  
144 protein sequences with significant (e-value <1e<sup>-3</sup>) homology to REBASE Gold Standard proteins

145 were further filtered by protein size. If an *E. faecium* query protein length was less than half of  
146 its subject's length, the match was removed from the prediction list. Due to the sequence  
147 diversity of REases which complicates their bioinformatic identification (15), guilt-by-association  
148 was used to identify full R-M systems as we have previously described (16). The proteins  
149 encoded near candidate DNA MTases were analyzed using BLAST and Pfam for conserved  
150 domains consistent with REase activities and/or sequence identity to confirmed REases. The  
151 amino acid sequence of each R-M candidate was then pairwise compared among all the eight  
152 strains to identify putative orthologs. If two protein sequences shared an amino acid identity  
153  $\geq 90\%$  with query coverage  $\geq 90\%$ , they were considered to be orthologous.

154

155 **Expression of R-M systems in *E. faecalis* heterologous hosts.** Genes encoding the  
156 specificity and methylation subunits of Efa733I (EFSG\_05028-EFSG\_05027) were PCR-  
157 amplified in their entirety, including the upstream region to retain the native promoter, using  
158 primers 733\_T1A\_SM\_F and 733\_T1A\_SM\_R (see Table S1 for primer sequences). The PCR  
159 product was digested with *NotI* and ligated into *NotI*-digested pWH03 (16) using T4 DNA Ligase  
160 (NEB), generating pHA102. pWH03 is a pLT06 derivative for expression of genes from a  
161 previously validated neutral genomic insertion site (EF2238-EF2239) for expression (GISE) (16,  
162 17). pHA102 constructs were then introduced into *E. coli* DH5 $\alpha$  via heat shock for propagation  
163 and sequence confirmation. pHA102 was electroporated into *E. faecalis* OG1SSp using a  
164 previously described method (18). An *E. faecalis* OG1SSp derivative with a chromosomal  
165 integration of Efa733I, referred to as OG1SSp::*efa733I*, was generated by temperature shifts  
166 and *p*-chlorophenylalanine counterselection, as previously described (19).

167

168 Genes encoding the specificity and methylation subunits of Efa502I (EFQG\_01131-  
169 EFQG\_01132) were PCR-amplified using primers 502\_T1A\_SM\_F and 502\_T1A\_SM\_R. The  
170 PCR product was then TA-cloned into the pGEM-T Easy Vector (Promega) and introduced into



171 DH5 $\alpha$  via heat shock to generate pGEM-SMA1. pGEM-SMA1 was then digested with *NotI*, and  
172 the digestion reaction was used as insert for ligation into *NotI*-digested pWH03. The ligation  
173 reaction was then introduced into DH5 $\alpha$ , and colonies were screened for chloramphenicol  
174 resistance and ampicillin susceptibility to ensure the pGEM backbone was not ligated into  
175 pWH03. Once the construct, referred to as pHA103, was confirmed via Sanger sequencing, it  
176 was introduced into electrocompetent *E. faecalis* OG1RF. An *E. faecalis* OG1RF derivative with  
177 a chromosomal integration of Efa502I, referred to as OG1RF::*efa502I*, was generated by  
178 temperature shifts and *p*-chlorophenylalanine counterselection. All plasmids and strains for  
179 heterologous expression were validated by PCR and Sanger sequencing.

180

181 **Generation of *E. faecium* R-M deletion mutants.** Regions up- and downstream of Efa502I  
182 and Efa733I were PCR-amplified using primers listed in Table S1, ligated into pLT06, and  
183 transformed into *E. coli* EC1000 (20), generating pWH16 and pWH17 (Table 1). Insert  
184 sequences were confirmed using Sanger sequencing. *E. faecium* strains were made  
185 electrocompetent using previously a published protocol (21). 2  $\mu$ g of sequence-confirmed  
186 plasmids were electroporated into electrocompetent Efm733 and Efm502. The generation of  
187 deletion mutants was accomplished using temperature shifts and *p*-chlorophenylalanine  
188 counterselection, as previously described (19). The successful deletion mutants were  
189 sequence-confirmed by PCR and Sanger sequencing.

190

191 **Transformation efficiency test.** Efm733, Efm502, and their respective R-M deletion mutants  
192 were made electrocompetent using a modified version of the previously published protocol (21).  
193 Briefly, overnight cultures were diluted 10-fold in BHI and cultured to OD<sub>600nm</sub> ~ 0.6. The bacteria  
194 were then pelleted and treated with filter-sterilized lysozyme buffer (10 mM Tris-HCl pH 8.0, 10  
195 mM EDTA pH 8.0, 50 mM NaCl) supplemented with 83  $\mu$ L of 2.5 KU/mL mutanolysin stock for  
196 30 min at 37°C. The cells were then pelleted and washed three times with ice-cold filter-

197 sterilized electroporation buffer (0.5 M sucrose and 10% glycerol). Finally, the cells were  
198 pelleted and resuspended in electroporation buffer and aliquoted for storage at -80°C and future  
199 use. 1 µg pAT28 (22) was electroporated into the electrocompetent *E. faecium* cells. The counts  
200 of total viable cells and spectinomycin-resistant cells were determined by serial dilution and  
201 plating. The transformation efficiency was expressed as percent of transformed (spectinomycin-  
202 resistant) cells per total viable cells. Three independent experiments were performed and the  
203 statistical significance was assessed using the unpaired one-tailed Student's t-test.

204

205 **Distribution analysis of putative R-M systems and orphan MTases.** The amino acid  
206 sequences for select R-M system and orphan MTase candidates were queried against a  
207 collection of 73 *E. faecium* isolates previously analyzed by Lebreton *et al* (8) using BLASTP.  
208 Any proteins which shared >90% query coverage and amino acid identity were considered  
209 orthologs. The Fisher's exact test was used to determine if an orphan MTase or R-M system  
210 was significantly over- or under-represented in a particular clade.

211

212 **REase protection assays.** To identify m5C methylation, gDNA was treated with the  
213 methylation-sensitive REases McrBC, FspEI, and MspJI (NEB). 500 ng gDNA was incubated  
214 with each REase at 37°C for 3 h (McrBC) or 6 h (FspEI and MspJI) followed by analysis by  
215 electrophoresis on a 1% agarose gel with ethidium bromide.

216

217 **Bisulfite sequencing.** Whole-genome bisulfite sequencing libraries were constructed using the  
218 Illumina TruSeq LT PCR FREE kit and the Qiagen EpiTect Bisulfite kit. Native DNA was isolated  
219 as described above. Whole-genome-amplified (WGA) control DNA was generated by  
220 amplification of native gDNA using the Qiagen REPLI-g® kit, per the manufacturer's  
221 instructions. For bisulfite sequencing, briefly, 2 µg each of native and WGA control DNA were  
222 fragmented using NEB fragmentase. DNA fragments ranging from 200 bp to 700 bp were gel

223 extracted and end-repaired. After A-tailing of DNA fragments, Illumina TruSeq adapters were  
224 ligated. Then, the bisulfite conversion was performed using the Qiagen EpiTect Bisulfite kit, per  
225 the manufacturer's instruction. An 8-cycle PCR enrichment with Illumina primer mix was  
226 performed, followed by size selection and gel purification. The libraries were sequenced using  
227 Illumina MiSeq with 2x75 bp paired-end chemistry.

228

229 **Whole genome bisulfite sequencing analysis.** The sequencing reads were analyzed using  
230 Bismark (23) with additional quality control and filtering as described previously (16). Briefly, the  
231 Illumina reads were mapped to the *in silico* bisulfite-converted references (23). Then, we  
232 quantified the conversion rate of each mapped read by calculating the percentage of converted  
233 C (which will result in T) to the total number of C in the reference within the mapped region. The  
234 mapped reads with  $\leq 80\%$  conversion rate were filtered out from analysis (16). Next, the  
235 coverage depth and methylation ratio were calculated for each C site. The methylation ratio was  
236 calculated by dividing the total number of C by the coverage depth at each C site. A fully  
237 methylated C, thus protected from bisulfite conversion, will have a methylation ratio near 1. An  
238 unmethylated C will have a methylation ratio near 0. To identify consensus methylation motifs, C  
239 sites with  $\geq 0.35$  methylation ratio and  $\geq 10$  coverage depth, along with the sequences of 5 bp  
240 upstream and 5 bp downstream, were extracted. The extracted sequences were subjected for  
241 MEME motif search (24).

242

243 **Confirmation of m5C MTase activity.** Primers EFSG\_00659\_F and EFSG\_00659\_R (Table  
244 S1) were used to amplify the entire Efm733 EFSG\_00659 coding region and its upstream  
245 predicted promoter. The PCR product was then cloned into the pGEM-T Easy Vector (Promega)  
246 per the manufacturer's instructions and transformed into *E. coli* STBL4 (Fisher) to generate  
247 pRB01. REase digestion assays with methylation-sensitive enzymes were performed on purified  
248 *E. coli* and *E. faecium* gDNA as described above.

249

250 **Accession numbers.** DNA sequence data generated in this study have been deposited in the  
251 Sequence Read Archive under accession numbers PRJNA397049 (for SMRT sequencing data)  
252 and PRJNA488088 (for Illumina bisulfite sequencing data).

253

## 254 **RESULTS**

255 **Identification of Clade A1-specific putative Type I R-M system in *E. faecium*.** We previously  
256 reported that a Type II R-M system significantly reduces HGT via conjugation (18) and  
257 transformation (16) in *E. faecalis*. Here, we hypothesize that the *E. faecium* clades encode  
258 distinct R-M systems that reduce the exchange of genetic information between them. We  
259 utilized an approach we previously developed for *E. faecalis* R-M analysis (18) to predict  
260 potential R-M systems in eight previously sequenced *E. faecium* genomes. The 8 genomes  
261 included 3 genomes from Clade A1, 3 genomes from Clade B, one genome from Clade A2, and  
262 one recombinant Clade A1/B hybrid (5, 8). Because REases are difficult to identify with  
263 bioinformatics, and MTase prediction is comparatively straightforward, as has been previously  
264 reported by NEB (15), we first identified predicted DNA MTases in *E. faecium* genomes, and  
265 then analyzed surrounding genes for predicted R-M-related activities. The complete list of  
266 candidates for the eight strains is shown in Table 2.

267

268 Interestingly, we predicted at least one putative Type I R-M system for seven of the eight *E.*  
269 *faecium* strains (Table 2). Type I R-M systems are multisubunit complexes comprised of a  
270 specificity subunit (S), a methylation subunit (M), and a restriction subunit (R) (11, 25-27). The S  
271 subunit is responsible for the specific DNA recognition motif and associates with the DNA to  
272 bring the M and R subunits into contact. The system has two conformations:  $M_2S_1$ , which is  
273 capable of methylating DNA based on the recognition sequence, and  $R_2M_2S_1$ , which is capable  
274 of restricting DNA (27, 28). One predicted *E. faecium* Type I R-M system is comprised of highly

275 conserved (>90% amino acid sequence identity) M and R subunits in six of eight genomes  
276 across both Clade A1 and Clade B (Table 2 and Dataset S1). The specificity subunit from this  
277 system, however, is highly conserved in Clade A1 genomes but not in Clade B (Table 2 and Fig.  
278 1a-b). S subunits possess two target recognition domains (TRDs) that determine the nucleotide  
279 sequence the subunit binds to (29, 30). The variation in amino acid sequence between the S  
280 subunits occurs within these TRDs (Fig 1a), suggesting that these S subunits recognize  
281 different DNA sequences. Notably, the S subunits from Clade A1 strains are identical to each  
282 other, indicating that they utilize the same recognition sequence.

283

284 To examine the distribution of this putative Clade A1-specific system in a larger collection of *E.*  
285 *faecium* strains, we analyzed 73 *E. faecium* genomes of mostly draft status that were reported  
286 previously (8). This list includes 15 clade B isolates, 21 clade A1 isolates, 35 clade A2 isolates,  
287 and 2 hybrid isolates (Table S2). We selected Efm502 (Clade A1) as our representative Clade  
288 A1 strain for this analysis and used Type I R-M sequences from this genome as references for  
289 analysis against the broader collection of *E. faecium* strains. The M and R subunits of the  
290 putative Clade A1-specific Type I system were detected in 51 and 52, respectively, of 73 *E.*  
291 *faecium* genomes, including both Clade A and Clade B strains (Fig S1a). However, the  
292 distribution of the S subunits varied (Fig S1a-b). The S subunit present in Efm502,  
293 EFQG\_01131, was significantly enriched within Clade A1 isolates (14/21; p-value <0.0001 using  
294 Fisher exact test; Fig S1a) and absent from all other clades with the exception of strain  
295 EnGen002, which is classified as a Clade A1/B hybrid strain. Interestingly, the S subunits  
296 present in most other *E. faecium* strains are strain-specific by the strict thresholds applied here.  
297 Given that the Efm502 S subunit is enriched in Clade A1, we hypothesize that many Clade A1  
298 strains exchange genetic information freely with each other while exchange with other *E.*  
299 *faecium* strains is restricted.

300

301 **SMRT sequencing for *E. faecium* methylome analysis.** We analyzed the Efm502 and  
302 Efm733 genomes by SMRT sequencing. SMRT sequencing measures the kinetics of DNA  
303 polymerase as it synthesizes DNA in order to identify bases that have been modified (31-33). It  
304 has been extensively utilized for bacterial methylome analysis (34-42). With SMRT sequencing,  
305 6-methyladenine (m6A) and 4-methylcytosine (m4C) can be easily detected with modest  
306 sequence coverage (~25x per strand), while 5-methylcytosine (m5C) detections requires high  
307 coverage (~250x per strand) (41, 43). Using SMRT sequencing, we identified two unique m6A  
308 methylation motifs in Efm502 and Efm733. Efm502 possessed m6A methylation at the  
309 underlined position of the motif 5'-RAYCNNNNNTTRG-3' and Efm733 possessed m6A  
310 methylation at the underlined position of the motif 5'-AGAWNNNNATTA-3' (Table 3). These  
311 sequences are asymmetric and bipartite, which is characteristic of Type I R-M methylation (12).  
312 Due to the coverage of our SMRT sequencing, m5C modification could not be accurately  
313 detected. The two unique m6A methylation patterns indicate that DNA from one strain would be  
314 recognized as foreign should it cross the strain barrier.

315

316 **Expression in heterologous hosts links methylation activity to genes in Efm502 and**  
317 **Efm733.** According to our predictions (Table 2), there is only one complete Type I R-M system  
318 encoded by each of Efm502 and Efm733. To determine if these systems are responsible for the  
319 methylation patterns identified by SMRT sequencing, we expressed the respective S and M  
320 subunits (EFQG\_01131-01132 for Efm502 and EFSG\_05028-05027 for Efm733) in the  
321 heterologous host *E. faecalis* OG1RF or its spectinomycin/streptomycin-resistant relative  
322 OG1SSp. Previous work in our lab had characterized the methylome of OG1RF using SMRT  
323 and bisulfite sequencing (16). This allowed us to attribute any new methylation patterns  
324 observed during SMRT sequencing to the *E. faecium* genes that were expressed in the OG1RF  
325 background. SMRT sequencing of these strains detected the same methylation patterns  
326 originally identified in Efm502 and Efm733 (Table 3). These data demonstrate that

327 EFQG\_01131-01132 is responsible for the 5'-RAYCNNNNNTTRG-3' methylation in Efm502  
328 and that EFSG\_05028-05027 is responsible for the 5'-AGAWNNNNATTA-3' methylation in  
329 Efm733. Because we have confirmed the function of these genes, we have named them  
330 Efa502I and Efa733I, which is consistent with the R-M system nomenclature convention  
331 established by New England Biolabs (12).

332

333 **Efa502I and Efa733I reduce transformation efficiency in *E. faecium*.** To determine whether  
334 the Type I R-M systems in Efm733 and Efm502 actively defend against exogenous DNA, we  
335 constructed null strains (Efm733 $\Delta$ RM and Efm502 $\Delta$ RM; Table 1) and evaluated their  
336 transformation efficiencies relative to their wild-type parent strains. Here, we utilized the broad  
337 host range plasmid pAT28 (Table 1) (22). pAT28 sequence has motifs recognized by the Type I  
338 R-M systems in both wild-type Efm733 (1 occurrence) and Efm502 (1 occurrence). The  
339 transformation of pAT28 into Efm733 and Efm502 served as a baseline for the experiment. If  
340 Efa733I and Efa502I are active, we expect to see higher pAT28 transformation efficiencies into  
341 Efm733 $\Delta$ RM and Efm502 $\Delta$ RM, respectively. Indeed, we observed significantly higher  
342 transformation efficiencies into Type I R-M system null strains (Fig 2; p-value<0.05 using one-  
343 tailed Student's t-test). These data demonstrate that the Type I R-M systems in Efm733 and  
344 Efm502 actively function as mechanisms of genome defense.

345

346 **m5C methylation occurs in Efm733.** As described previously, our SMRT sequencing had  
347 insufficient coverage depth for m5C methylome characterization. Hence, we used REase  
348 protection assays with commercially available methylation-sensitive REases to query the  
349 presence of m5C methylation in our eight *E. faecium* strains. Table 4 summarizes the  
350 recognition sequences and modifications of the enzymes used in this study. Only Efm733  
351 showed evidence of cytosine modification, as it was digested by MspJI (Table 4; Fig S2).

352

353 To determine the exact cytosine methylation motif present in Efm733, gDNA was subjected to  
354 whole-genome bisulfite sequencing. Whole genome amplified (WGA) DNA was used as  
355 negative control since WGA removes all modifications. During bisulfite treatment, cytosine  
356 bases are converted to thymine unless they are protected by either m4C or m5C methylation.  
357 Additionally, our lab has previously published a method of distinguishing between m4C and  
358 m5C methylation using thymine conversion ratios of sequencing reads after bisulfite treatment  
359 (44). m5C methylation is sufficient to protect the cytosine residue completely from bisulfite  
360 conversion, so that most sequencing reads at that position contain the original cytosine base.  
361 However, m4C methylation provides only partial protection from bisulfite conversion, so a  
362 thymine conversion rate of 0.5 at a particular position within the sequencing reads suggests the  
363 presence of m4C methylation. Bisulfite conversion and subsequent sequencing revealed that  
364 Efm733 possesses m5C modification at the motif 5'-R<sup>m</sup>CCGGY-3' (Table 5, Fig 3, and Fig S3;  
365 the methylation occurs at the underlined position), which overlaps the MspJI recognition site (5'-  
366 CNNR-3') and hence supports the evidence of methylation obtained from the MspJI digestion  
367 assays. Based on the cytosine conversion ratio of close to 1.0, m5C modification is supported,  
368 which is consistent with why it was not detected by our SMRT sequencing.

369

370 **EFSG\_00659 is responsible for m5C methylation in Efm733.** Based on the bioinformatics  
371 analyses, we hypothesized that EFSG\_00659 was responsible for the m5C methylation found in  
372 Efm733 (Table 2). EFSG\_00659 possessed no homologs in the other seven strains analyzed,  
373 making it a good candidate for the unique methylation found in Efm733. We queried the  
374 EFSG\_00659 protein sequence against the REBASE gold standard list and identified that it has  
375 high sequence similarity to M.AvaIX, M.VchO395I and M.VchAI (e-value  $\leq 3e^{-125}$ ; recognition  
376 sites are 5'-RCCGGY-3'). Interestingly, BLASTP identified no significant hits when  
377 EFSG\_00659 was queried against the larger collection of 73 *E. faecium* genomes, indicating its  
378 unique presence in Efm733.



379

380 In order to link EFSG\_00659 with the m5C methylation identified during bisulfite sequencing, we  
381 expressed it in the heterologous host *E. coli* STBL4 and performed an REase protection assay.  
382 The REase Agel recognizes the motif 5'-ACCGGT-3', and its enzymatic activity is blocked if  
383 m5C methylation is present at the underlined position. This motif overlaps the m5C methylation  
384 motif in Efm733 identified by bisulfite sequencing. If the motif is methylated, DNA will be  
385 protected against digestion. We cloned EFSG\_00659 into the vector pGEM-T and transformed it  
386 into *E. coli* STBL4, generating strain *E. coli* STBL4(pRB01). Genomic DNA from Efm733,  
387 STBL4(pGEM-T), and STBL4(pRB01) was treated with Agel per the manufacturer's instructions.  
388 EcoRI was used as a positive control for digestion. Figure 4 shows representative results of the  
389 digestions on a 1% agarose gel. As expected, Efm733 was digested by EcoRI and protected  
390 against digestion from Agel. STBL4(pGEM-T) was digested by both EcoRI and Agel, indicating  
391 that the original host and empty vector pGEM-T did not possess the appropriate m5C  
392 methylation. STBL4(pRB01) was protected against digestion by Agel, demonstrating that  
393 EFSG\_00659 is responsible for the 5'-R<sup>m</sup>CCGGY-3' methylation found in Efm733.

394

## 395 **DISCUSSION**

396 In this study, we used a combination of genomic and genetic approaches to identify a functional  
397 Type I R-M system that is enriched in Clade A1 *E. faecium* and that significantly alters  
398 transformability of a model Clade A1 strain. We propose that this R-M system impacts HGT  
399 rates among *E. faecium* mixed-clade communities, thereby helping to maintain the observed  
400 phylogenetic structure of *E. faecium* and facilitating HGT specifically among Clade A1 strains.  
401 Mixed communities of *E. faecium* clades are expected to occur in environments where healthy  
402 and ill human hosts, human and animal hosts, and/or the feces of any of these hosts co-mingle  
403 (i.e. in sewage). In future studies, we plan to assess the impact of R-M on conjugative plasmid

404 transfer, which is a major mode of HGT in enterococci and was not assessed in our current  
405 study.

406

407 An interesting observation from our study is the sequence diversity of Type I S subunits  
408 encoded within *E. faecium* Type R-M systems having nearly identical R and M subunits (Fig  
409 S1a-b). After further investigation into those alignments, we found that those S subunits sharing  
410 50-70% overall amino acid sequence identities possess sequence diversity within one TRD  
411 domain, where the other TRD domain and the central conserved domain are conserved. This  
412 suggests that these systems share partial recognition sequences. Previous research has  
413 reported that the diversification of Type I R-M recognition sequences is driven by TRD  
414 exchanges, permutation of the dimerization domain, and circular permutation of TRDs (45). Our  
415 observation suggests that TRD recombination and reorganization events occur for *E. faecium*  
416 Type I R-M systems outside Clade A1. Future studies will use genomics to further explore the  
417 relationship between S subunit sequence diversity and its impact on *E. faecium* methylomes  
418 and inter-strain and inter-clade HGT.

419

#### 420 **Acknowledgments**

421 This work was supported by Public Health Service grants K22AI099088 and R01AI116610 to  
422 K.L.P.

423

## 424 References

- 425 1. Noble CJ. 1978. Carriage of group D streptococci in the human bowel. *J Clin Pathol* 31:1182-6.
- 426 2. Chenoweth C, Schaberg D. 1990. The epidemiology of enterococci. *Eur J Clin Microbiol Infect Dis*  
427 9:80-9.
- 428 3. Agudelo Higueta NI, Huycke MM. 2014. Enterococcal Disease, Epidemiology, and Implications for  
429 Treatment. *In* Gilmore MS, Clewell DB, Ike Y, Shankar N (ed), *Enterococci: From Commensals to*  
430 *Leading Causes of Drug Resistant Infection*, Boston.
- 431 4. Louis E, Galloway-Peña J, Roh JH, Latorre M, Qin X, Murray BE. 2012. Genomic and SNP Analyses  
432 Demonstrate a Distant Separation of the Hospital and Community-Associated Clades of  
433 *Enterococcus faecium*. *PLoS ONE* 7:e30187.
- 434 5. Palmer KL, Godfrey P, Griggs A, Kos VN, Zucker J, Desjardins C, Cerqueira G, Gevers D, Walker S,  
435 Wortman J, Feldgarden M, Haas B, Birren B, Gilmore MS. 2012. Comparative genomics of  
436 enterococci: variation in *Enterococcus faecalis*, clade structure in *E. faecium*, and defining  
437 characteristics of *E. gallinarum* and *E. casseliflavus*. *MBio* 3:e00318-11.
- 438 6. Willems RJL, Top J, van Schaik W, Leavis H, Bonten M, Siren J, Hanage WP, Corander J. 2012.  
439 Restricted Gene Flow among Hospital Subpopulations of *Enterococcus faecium*. *mBio* 3.
- 440 7. van Schaik W, Top J, Riley DR, Boekhorst J, Vrijenhoek JE, Schapendonk CM, Hendrickx AP,  
441 Nijman IJ, Bonten MJ, Tettelin H, Willems RJ. 2010. Pyrosequencing-based comparative genome  
442 analysis of the nosocomial pathogen *Enterococcus faecium* and identification of a large  
443 transferable pathogenicity island. *BMC Genomics* 11:239.
- 444 8. Lebreton F, van Schaik W, McGuire AM, Godfrey P, Griggs A, Mazumdar V, Corander J, Cheng L,  
445 Saif S, Young S, Zeng Q, Wortman J, Birren B, Willems RJ, Earl AM, Gilmore MS. 2013. Emergence  
446 of epidemic multidrug-resistant *Enterococcus faecium* from animal and commensal strains.  
447 *MBio* 4.
- 448 9. Nandi T, Holden MTG, Didelot X, Mehershahi K, Boddey JA, Beacham I, Peak I, Harting J,  
449 Baybayan P, Guo Y, Wang S, How LC, Sim B, Essex-Lopresti A, Sarkar-Tyson M, Nelson M, Smither  
450 S, Ong C, Aw LT, Hoon CH, Michell S, Studholme DJ, Titball R, Chen SL, Parkhill J, Tan P. 2015.  
451 *Burkholderia pseudomallei* sequencing identifies genomic clades with distinct recombination,  
452 accessory, and epigenetic profiles. *Genome Research* 25:129-141.
- 453 10. Budroni S, Siena E, Hotopp JCD, Seib KL, Serruto D, Nofroni C, Comanducci M, Riley DR,  
454 Daugherty SC, Angiuoli SV, Covacci A, Pizza M, Rappuoli R, Moxon ER, Tettelin H, Medini D. 2011.  
455 *Neisseria meningitidis* is structured in clades associated with restriction modification systems  
456 that modulate homologous recombination. *Proceedings of the National Academy of Sciences*  
457 108:4494-4499.
- 458 11. Tock MR, Dryden DT. 2005. The biology of restriction and anti-restriction. *Curr Opin Microbiol*  
459 8:466-72.

- 460 12. Roberts RJ, Belfort M, Bestor T, Bhagwat AS, Bickle TA, Bitinaite J, Blumenthal RM, Degtyarev S,  
461 Dryden DT, Dybvig K, Firman K, Gromova ES, Gumpert RI, Halford SE, Hattman S, Heitman J,  
462 Hornby DP, Janulaitis A, Jeltsch A, Josephsen J, Kiss A, Klaenhammer TR, Kobayashi I, Kong H,  
463 Kruger DH, Lacks S, Marinus MG, Miyahara M, Morgan RD, Murray NE, Nagaraja V, Piekarowicz  
464 A, Pingoud A, Raleigh E, Rao DN, Reich N, Repin VE, Selker EU, Shaw PC, Stein DC, Stoddard BL,  
465 Szybalski W, Trautner TA, Van Etten JL, Vitor JM, Wilson GG, Xu SY. 2003. A nomenclature for  
466 restriction enzymes, DNA methyltransferases, homing endonucleases and their genes. *Nucleic  
467 Acids Res* 31:1805-12.
- 468 13. Adams HM, Li X, Mascio C, Chesnel L, Palmer KL. 2015. Mutations associated with reduced  
469 surotomycin susceptibility in *Clostridium difficile* and *Enterococcus* species. *Antimicrob Agents  
470 Chemother* 59:4139-47.
- 471 14. Palmer KL, Carniol K, Manson JM, Heiman D, Shea T, Young S, Zeng Q, Gevers D, Feldgarden M,  
472 Birren B, Gilmore MS. 2010. High-quality draft genome sequences of 28 *Enterococcus* sp.  
473 isolates. *J Bacteriol* 192:2469-70.
- 474 15. Roberts RJ, Vincze T, Posfai J, Macelis D. 2015. REBASE—a database for DNA restriction and  
475 modification: enzymes, genes and genomes. *Nucleic Acids Research* 43:D298-D299.
- 476 16. Huo W, Adams HM, Zhang MQ, Palmer KL. 2015. Genome Modification in *Enterococcus faecalis*  
477 OG1RF Assessed by Bisulfite Sequencing and Single-Molecule Real-Time Sequencing. *J Bacteriol*  
478 197:1939-51.
- 479 17. DebRoy S, van der Hoeven R, Singh KV, Gao P, Harvey BR, Murray BE, Garsin DA. 2012.  
480 Development of a genomic site for gene integration and expression in *Enterococcus faecalis*.  
481 *Journal of Microbiological Methods* 90:1-8.
- 482 18. Price VJ, Huo W, Sharifi A, Palmer KL. 2016. CRISPR-Cas and Restriction-Modification Act  
483 Additively against Conjugative Antibiotic Resistance Plasmid Transfer in *Enterococcus faecalis*.  
484 *mSphere* 1.
- 485 19. Thurlow LR, Thomas VC, Hancock LE. 2009. Capsular polysaccharide production in *Enterococcus*  
486 *faecalis* and contribution of CpsF to capsule serospecificity. *J Bacteriol* 191:6203-10.
- 487 20. Leenhouts K, Buist G, Bolhuis A, ten Berge A, Kiel J, Mierau I, Dabrowska M, Venema G, Kok J.  
488 1996. A general system for generating unlabelled gene replacements in bacterial chromosomes.  
489 *Mol Gen Genet* 253:217-24.
- 490 21. Bhardwaj P, Ziegler E, Palmer KL. 2016. Chlorhexidine Induces VanA-Type Vancomycin  
491 Resistance Genes in Enterococci. *Antimicrob Agents Chemother* 60:2209-21.
- 492 22. Trieu-Cuot P, Carlier C, Poyart-Salmeron C, Courvalin P. 1990. A pair of mobilizable shuttle  
493 vectors conferring resistance to spectinomycin for molecular cloning in *Escherichia coli* and in  
494 Gram-positive bacteria. *Nucleic Acids Research* 18:4296-4296.
- 495 23. Krueger F, Andrews SR. 2011. Bismark: a flexible aligner and methylation caller for Bisulfite-Seq  
496 applications. *Bioinformatics* 27:1571-2.

- 497 24. Bailey TL, Boden M, Buske FA, Frith M, Grant CE, Clementi L, Ren J, Li WW, Noble WS. 2009.  
498 MEME SUITE: tools for motif discovery and searching. *Nucleic Acids Res* 37:W202-8.
- 499 25. Luria SE, Human ML. 1952. A nonhereditary, host-induced variation of bacterial viruses. *J*  
500 *Bacteriol* 64:557-69.
- 501 26. Bertani G, Weigle JJ. 1953. Host controlled variation in bacterial viruses. *J Bacteriol* 65:113-21.
- 502 27. Murray NE. 2000. Type I restriction systems: sophisticated molecular machines (a legacy of  
503 Bertani and Weigle). *Microbiol Mol Biol Rev* 64:412-34.
- 504 28. Taylor I, Patel J, Firman K, Kneale G. 1992. Purification and biochemical characterisation of the  
505 EcoR124 type I modification methylase. *Nucleic Acids Res* 20:179-86.
- 506 29. Gough JA, Murray NE. 1983. Sequence diversity among related genes for recognition of specific  
507 targets in DNA molecules. *J Mol Biol* 166:1-19.
- 508 30. Gann AA, Campbell AJ, Collins JF, Coulson AF, Murray NE. 1987. Reassortment of DNA  
509 recognition domains and the evolution of new specificities. *Mol Microbiol* 1:13-22.
- 510 31. Clarke J, Wu H-C, Jayasinghe L, Patel A, Reid S, Bayley H. 2009. Continuous base identification for  
511 single-molecule nanopore DNA sequencing. *Nature Nanotechnology* 4:265-270.
- 512 32. Eid J, Fehr A, Gray J, Luong K, Lyle J, Otto G, Peluso P, Rank D, Baybayan P, Bettman B, Bibillo A,  
513 Bjornson K, Chaudhuri B, Christians F, Cicero R, Clark S, Dalal R, Dewinter A, Dixon J, Foquet M,  
514 Gaertner A, Hardenbol P, Heiner C, Hester K, Holden D, Kearns G, Kong X, Kuse R, Lacroix Y, Lin S,  
515 Lundquist P, Ma C, Marks P, Maxham M, Murphy D, Park I, Pham T, Phillips M, Roy J, Sebra R,  
516 Shen G, Sorenson J, Tomaney A, Travers K, Trulson M, Vieceli J, Wegener J, Wu D, Yang A,  
517 Zaccarin D, et al. 2009. Real-time DNA sequencing from single polymerase molecules. *Science*  
518 323:133-8.
- 519 33. Korlach J, Bjornson KP, Chaudhuri BP, Cicero RL, Flusberg BA, Gray JJ, Holden D, Saxena R,  
520 Wegener J, Turner SW. 2010. Real-time DNA sequencing from single polymerase molecules.  
521 *Methods Enzymol* 472:431-55.
- 522 34. Clark TA, Murray IA, Morgan RD, Kislyuk AO, Spittle KE, Boitano M, Fomenkov A, Roberts RJ,  
523 Korlach J. 2012. Characterization of DNA methyltransferase specificities using single-molecule,  
524 real-time DNA sequencing. *Nucleic Acids Research* 40:e29-e29.
- 525 35. Fang G, Munera D, Friedman DI, Mandlik A, Chao MC, Banerjee O, Feng Z, Losic B, Mahajan MC,  
526 Jabado OJ, Deikus G, Clark TA, Luong K, Murray IA, Davis BM, Keren-Paz A, Chess A, Roberts RJ,  
527 Korlach J, Turner SW, Kumar V, Waldor MK, Schadt EE. 2012. Genome-wide mapping of  
528 methylated adenine residues in pathogenic *Escherichia coli* using single-molecule real-time  
529 sequencing. *Nature Biotechnology* 30:1232-1239.
- 530 36. Murray IA, Clark TA, Morgan RD, Boitano M, Anton BP, Luong K, Fomenkov A, Turner SW,  
531 Korlach J, Roberts RJ. 2012. The methylomes of six bacteria. *Nucleic Acids Res* 40:11450-62.

- 532 37. Bendall ML, Luong K, Wetmore KM, Blow M, Korfach J, Deutschbauer A, Malmstrom RR. 2013.  
533 Exploring the Roles of DNA Methylation in the Metal-Reducing Bacterium *Shewanella oneidensis*  
534 MR-1. *Journal of Bacteriology* 195:4966-4974.
- 535 38. Davis BM, Chao MC, Waldor MK. 2013. Entering the era of bacterial epigenomics with single  
536 molecule real time DNA sequencing. *Current Opinion in Microbiology* 16:192-198.
- 537 39. Kozdon JB, Melfi MD, Luong K, Clark TA, Boitano M, Wang S, Zhou B, Gonzalez D, Collier J, Turner  
538 SW, Korfach J, Shapiro L, McAdams HH. 2013. Global methylation state at base-pair resolution of  
539 the *Caulobacter* genome throughout the cell cycle. *Proceedings of the National Academy of*  
540 *Sciences* 110:E4658-E4667.
- 541 40. Richardson PM, Lluch-Senar M, Luong K, Lloréns-Rico V, Delgado J, Fang G, Spittle K, Clark TA,  
542 Schadt E, Turner SW, Korfach J, Serrano L. 2013. Comprehensive Methylome Characterization of  
543 *Mycoplasma genitalium* and *Mycoplasma pneumoniae* at Single-Base Resolution. *PLoS Genetics*  
544 9:e1003191.
- 545 41. Roberts RJ, Carneiro MO, Schatz MC. 2013. The advantages of SMRT sequencing. *Genome*  
546 *Biology* 14.
- 547 42. Krebs J, Morgan RD, Bunk B, Spröer C, Luong K, Parusel R, Anton BP, König C, Josenhans C,  
548 Overmann J, Roberts RJ, Korfach J, Suerbaum S. 2014. The complex methylome of the human  
549 gastric pathogen *Helicobacter pylori*. *Nucleic Acids Research* 42:2415-2432.
- 550 43. Flusberg BA, Webster DR, Lee JH, Travers KJ, Olivares EC, Clark TA, Korfach J, Turner SW. 2010.  
551 Direct detection of DNA methylation during single-molecule, real-time sequencing. *Nat Methods*  
552 7:461-5.
- 553 44. Huo W. 2017. *Enterococcus faecalis* Genome Defense Systems and Their Impact on Conjugative  
554 Antibiotic Resistance Plasmid Transfer. 10970358. The University of Texas at Dallas, Ann Arbor.
- 555 45. Loenen WAM, Dryden DTF, Raleigh EA, Wilson GG. 2013. Type I restriction enzymes and their  
556 relatives. *Nucleic Acids Research* 42:20-44.
- 557 46. Gold OG, Jordan HV, van Houte J. 1975. The prevalence of enterococci in the human mouth and  
558 their pathogenicity in animal models. *Arch Oral Biol* 20:473-7.
- 559
- 560

561 **Table 1. Strains used in this study.**

| Strain                       | Description                                                                        | Reference  |
|------------------------------|------------------------------------------------------------------------------------|------------|
| <i>Enterococcus faecium</i>  |                                                                                    |            |
| 1,231,502                    | Clade A1 isolate; also referred to as Efm502                                       | (14)       |
| 1,230,933                    | Clade A1 isolate                                                                   | (14)       |
| 1,231,410                    | Clade A1 isolate                                                                   | (14)       |
| 1,231,408                    | Hybrid Clade A1/B isolate                                                          | (14)       |
| 1,231,501                    | Clade A2 isolate                                                                   | (14)       |
| 1,141,733                    | Clade B isolate; also referred to as Efm733                                        | (14)       |
| Com12                        | Clade B isolate                                                                    | (14)       |
| Com15                        | Clade B isolate                                                                    | (14)       |
| Efm733 $\Delta$ RM           | Efm733 with deletion of Efa733I<br>(EFSG_05027-29)                                 | This study |
| Efm502 $\Delta$ RM           | Efm502 with deletion of Efa502I<br>(EFQG_01130-32)                                 | This study |
| <i>Enterococcus faecalis</i> |                                                                                    |            |
| OG1RF                        | Rifampicin- and fusidic acid-resistant<br>derivative of <i>E. faecalis</i> OG1     | (46)       |
| OG1SSp                       | Streptomycin- and spectinomycin-resistant<br>derivative of <i>E. faecalis</i> OG1  | (46)       |
| OG1RF:: <i>efa502I</i>       | OG1RF with Efa502I inserted at GISE site                                           | This study |
| OG1SSp:: <i>efa733I</i>      | OG1SSp with Efa733I inserted at GISE site                                          | This study |
| <i>Escherichia coli</i>      |                                                                                    |            |
| EC1000                       | Plasmid propagation host                                                           | (20)       |
| DH5 $\alpha$                 | Plasmid propagation host                                                           |            |
| STBL4                        | Plasmid propagation host                                                           | Fisher     |
| STBL4(pGEM-T)                | STBL4 with pGEM-T Easy                                                             | This study |
| STBL4(pRB01)                 | STBL4 with pGEM-T Easy vector containing<br>EFSG_00659                             | This study |
| Plasmids                     |                                                                                    |            |
| pGEM-T Easy                  | Commercial plasmid for gene propagation                                            | Promega    |
| pLT06                        | Temperature-sensitive plasmid                                                      | (19)       |
| pAT28                        | Shuttle vector for <i>E. faecalis</i>                                              | (22)       |
| pWH03                        | Used for gene insertion in the enterococci                                         | (16)       |
| pRB01                        | pGEM-T Easy Vector with EFSG_00659                                                 | This study |
| pHA102                       | pWH03 containing NotI-digested fragments of<br>Efa733I M and S loci (EFSG_05028-9) | This study |
| pHA103                       | pWH03 containing NotI-digested fragments of<br>Efa502I M and S loci (EFQG_01131-2) | This study |
| pWH16                        | pLT06 containing fragments from upstream<br>and downstream of Efa502I              | This study |
| pWH17                        | pLT06 containing fragments from upstream<br>and downstream of Efa733I              | This study |

562 **Table 2. Distribution of predicted DNA MTases and R-M Systems\*.**

| Strain name                            |                   | 1,230,933                        | 1,231,410                     | 1,231,502         | 1,231,501         | 1,231,408         | 1,141,733         | Com12 | Com15             |
|----------------------------------------|-------------------|----------------------------------|-------------------------------|-------------------|-------------------|-------------------|-------------------|-------|-------------------|
| Clade                                  |                   | A1                               | A1                            | A1                | A2                | Hybrid A1/B       | B                 | B     | B                 |
| Type I Restriction Modification System | Specificity       | <b>EFPG_01270</b>                | <b>EFTG_00783</b>             | <b>EFQG_01131</b> |                   | <b>EFUG_01527</b> | <b>EFSG_05028</b> |       | <b>EFWG_02518</b> |
|                                        | Modification      | <b>EFPG_01269</b>                | <b>EFTG_00782</b>             | <b>EFQG_01132</b> |                   | <b>EFUG_01526</b> | <b>EFSG_05029</b> |       | <b>EFWG_02519</b> |
|                                        | Restriction       | <b>EFPG_01271</b>                | <b>EFTG_00784</b>             | <b>EFQG_01130</b> |                   | <b>EFUG_01528</b> | <b>EFSG_05027</b> |       | <b>EFWG_02517</b> |
| Type I Restriction Modification System | Specificity       | <b>EFPG_05435 and EFPG_05434</b> | <b>EFTG_02031</b>             |                   |                   |                   |                   |       |                   |
|                                        | Modification      | <b>EFPG_05433</b>                | <b>EFTG_02032</b>             |                   |                   |                   |                   |       |                   |
|                                        | Restriction       | <b>EFPG_05436</b>                | <b>EFTG_02030</b>             |                   |                   |                   |                   |       |                   |
| Type I Restriction Modification System | Specificity       |                                  |                               |                   | <b>EFRG_00106</b> |                   |                   |       |                   |
|                                        | Modification      |                                  |                               |                   | <b>EFRG_00107</b> |                   |                   |       |                   |
|                                        | Restriction       |                                  |                               |                   | <b>EFRG_00105</b> |                   |                   |       |                   |
| Type II Methyltransferase              | <b>EFPG_01821</b> | <b>EFTG_02364; EFTG_02653</b>    | <b>EFQG_01609, EFQG_02270</b> |                   |                   | <b>EFSG_00659</b> |                   |       |                   |
| Unspecified Methyltransferases         |                   | <b>EFTG_02333</b>                |                               | <b>EFRG_02239</b> | <b>EFUG_01512</b> |                   | <b>EFVG_00502</b> |       |                   |

563 \*Loci that are in black are strain specific. Loci that are the same color are conserved in their protein sequences based on a >90% sequence  
564 identity threshold. An empty cell indicates that the system was not detected.



565 **Table 3. SMRT Sequencing results.**

| Strain                     | Motif (5' -> 3')        | Modified Position | Type | % Motif Detected | # of Motifs Detected | # of Motifs in Genome | Mean Motif Coverage |
|----------------------------|-------------------------|-------------------|------|------------------|----------------------|-----------------------|---------------------|
| Efm502                     | RAYC <u>N</u> NNNNNTTRG | 2                 | m6A  | 98.8             | 905                  | 916                   | 53.7                |
|                            | CYA <u>A</u> NNNNNNGRTY | 4                 | m6A  | 97.9             | 897                  | 916                   | 54.5                |
| Efm733                     | <u>A</u> GAWNNNNATTA    | 1                 | m6A  | 78.5             | 278                  | 354                   | 22.3                |
|                            | TA <u>A</u> TNNNNWTCT   | 3                 | m6A  | 73.2             | 259                  | 354                   | 23.6                |
| OG1RF::<br><i>efa502l</i>  | RAYC <u>N</u> NNNNNTTRG | 2                 | m6A  | 99.9             | 795                  | 796                   | 162.8               |
|                            | CYA <u>A</u> NNNNNNGRTY | 4                 | m6A  | 99.0             | 788                  | 796                   | 163.2               |
| OG1SSp::<br><i>efa733l</i> | <u>A</u> GAWNNNNATTA    | 1                 | m6A  | 99.0             | 323                  | 326                   | 180.4               |
|                            | TA <u>A</u> TNNNNWTCT   | 3                 | m6A  | 98.5             | 321                  | 326                   | 180.8               |

566

567 **Table 4. Methylation-sensitive REase digestion reaction results<sup>1</sup>.**

| REase | Recognition sequence                                                        | Recognition methylation | Strains Digested |
|-------|-----------------------------------------------------------------------------|-------------------------|------------------|
| McrBC | 5'-R <sup>m</sup> C(N <sub>40</sub> -N <sub>3000</sub> )R <sup>m</sup> C-3' | m5C, m4C                | 0/8              |
| FspEI | 5'-C <sup>m</sup> C-3'                                                      | m5C                     | 0/8              |
| MspJI | 5'- <sup>m</sup> CNNR-3'                                                    | m5C                     | Efm733           |

568 <sup>1</sup>Recognition sequences and methylation patterns were retrieved from NEB.

569 **Table 5. Bisulfite sequencing results.**

|     | methylation motif     | methylation position | methylation type | # motifs detected <sup>a</sup> | # motifs in genome | # motif pass cvg filter | average methylation ratio <sup>b</sup> | mean motif coverage <sup>c</sup> |
|-----|-----------------------|----------------------|------------------|--------------------------------|--------------------|-------------------------|----------------------------------------|----------------------------------|
| 733 | 5'-R <u>C</u> CGGY-3' | 2                    | m5C              | 748                            | 780                | 750                     | 96.5% (6.2%)                           | 61.5X                            |

570 <sup>a</sup># motifs detected is defined as motifs with coverage depth more than 10X and methylation ratio >=0.35.

571 <sup>b</sup>Average methylation ratio is defined as the mean of the methylation ratio from all motifs in the genome.

a).

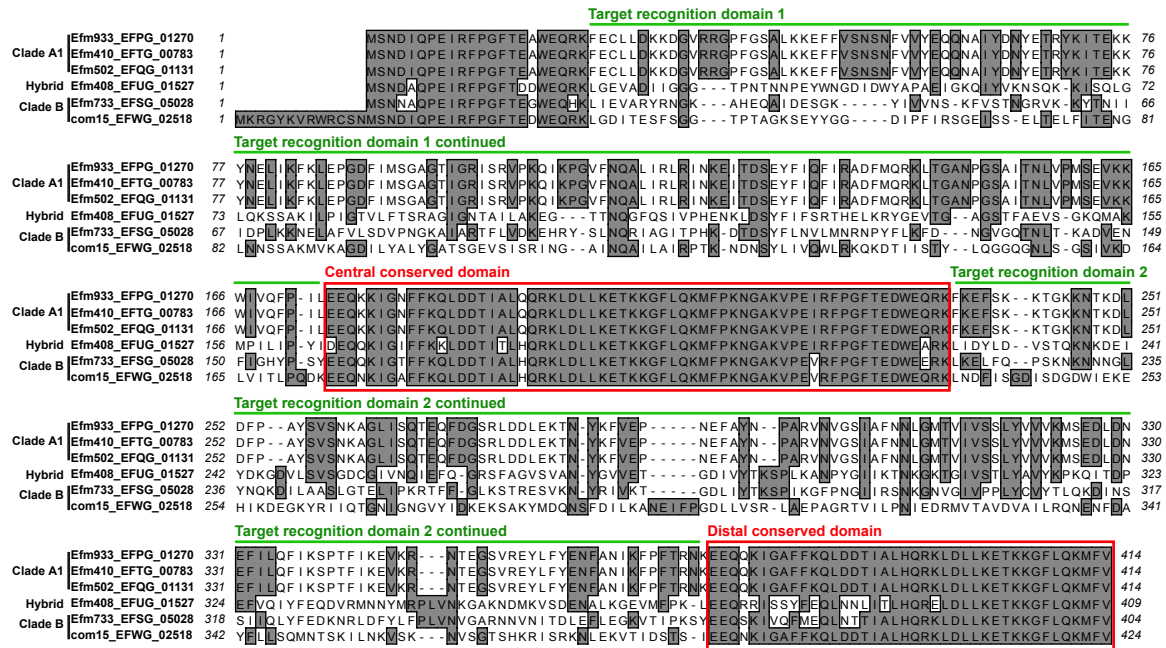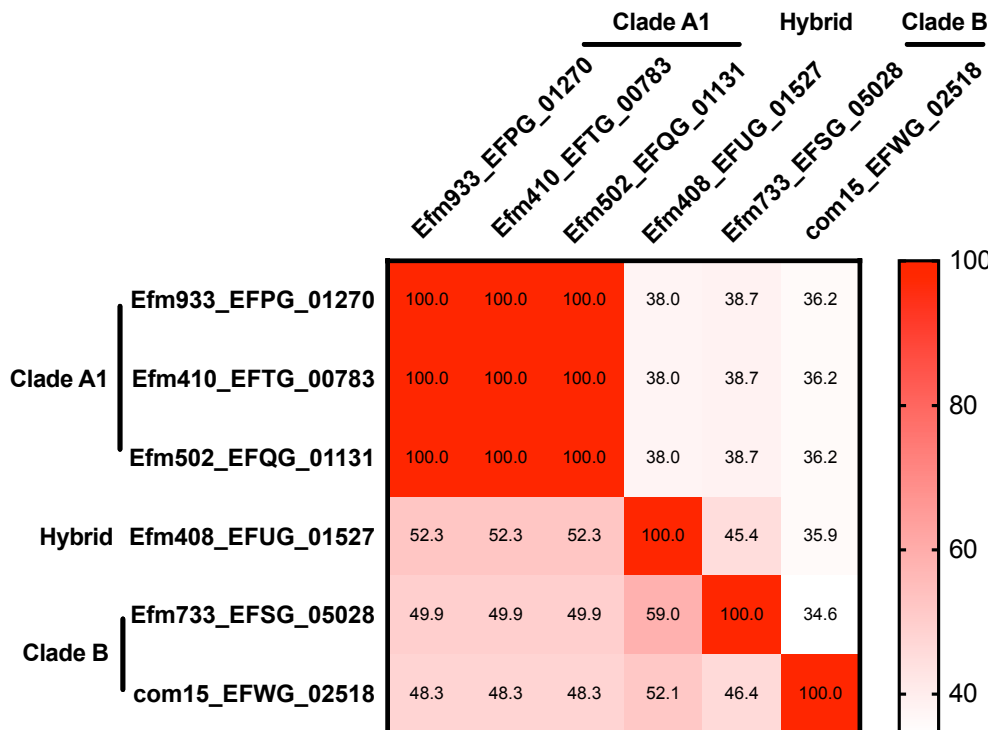

b).

**Figure 1. Conservation and variability of S subunits.** The protein sequences of predicted S subunits from 6 (out of 8) representative *E. faecium* genomes were pairwise

aligned using MacVector. The alignment is shown in (a). Central and distal conserved domain was identified based on sequence homology and labeled in red (30). The target recognition domains were interpreted based on conserved domains as labeled in green. The percent identity of each pair is shown in (b). White to red: low to high percent identities. Each number represents percent identity of one protein sequence (row name) to another (column name).

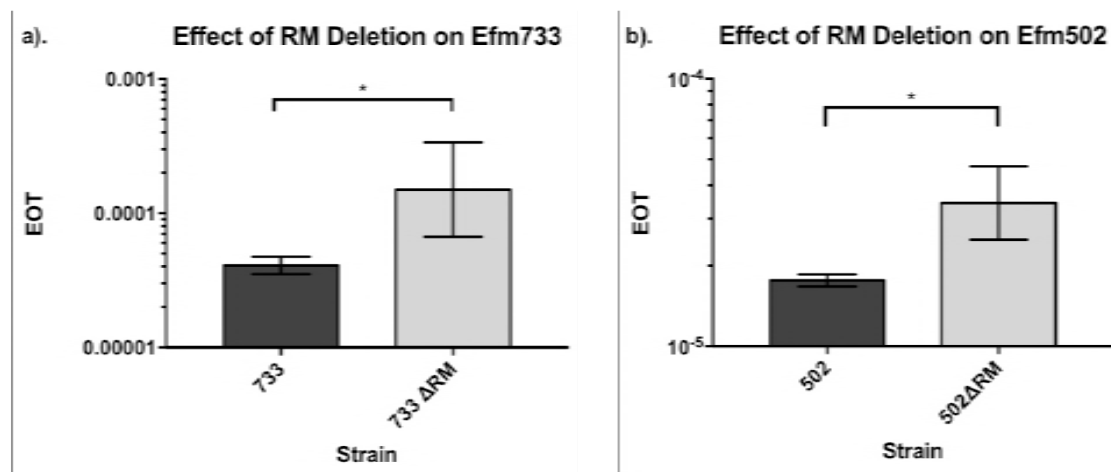

**Figure 2. Type I R-M systems reduce transformability of Efm733 and Efm502.**

Three independent transformation experiments were performed. There is a statistical difference between the transformation efficiency of pAT28 into wild type and R-M null strains of Efm733 and Efm502. EOT: Efficiency of transfer. \*:  $p < 0.05$ .

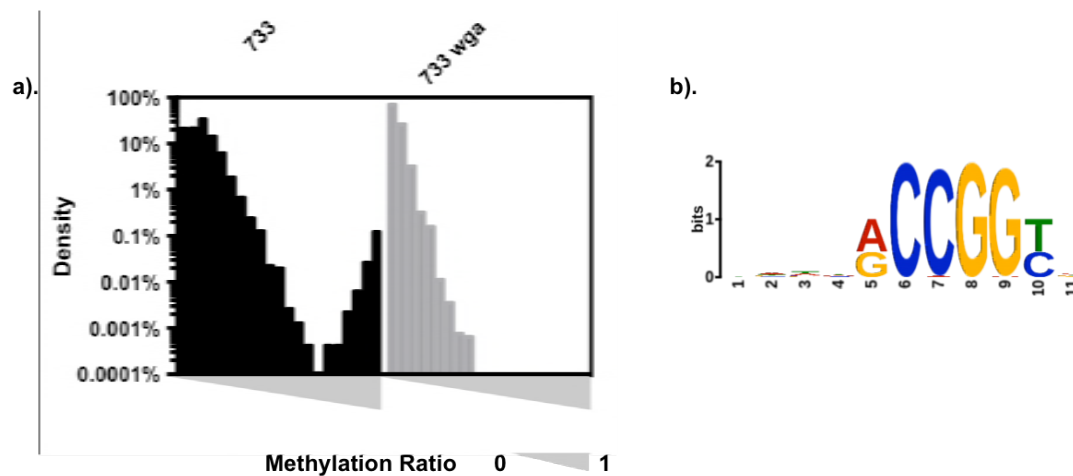

**Figure 3. Bisulfite sequencing results for Efm733.** a) Efm733 gDNA and its whole genome amplified (WGA) control were bisulfite-converted, and the methylation ratio for each cytosine site was calculated. Efm733 gDNA has cytosines with methylation ratios near 100%, indicating the presence of m5C methylation. b) All sites with  $\geq 0.35$  methylation ratio from native gDNA samples were extracted, together with 5 bp upstream and 5 bp downstream. The sequences are subjected for consensus motif analysis using MEME. The consensus motif identified by this analysis is shown.

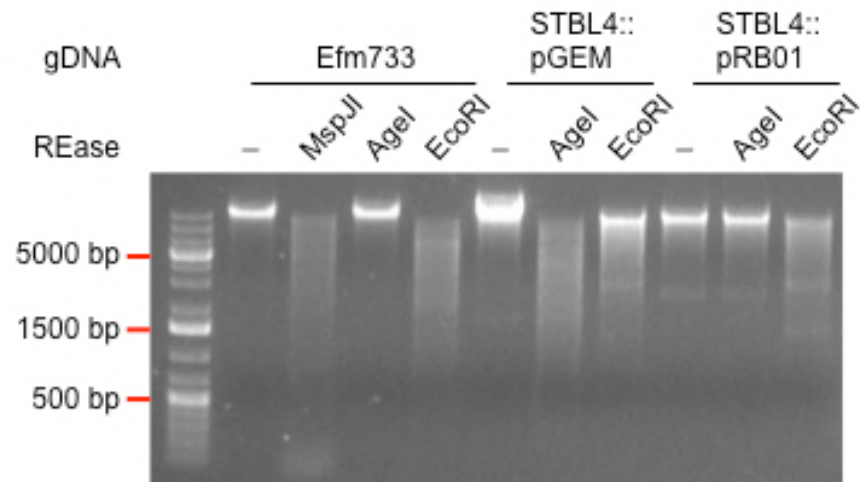

**Figure 4. EFSG\_00659 confers protection against Agel digestion.** Agel digestion reactions were analyzed by agarose gel electrophoresis with ethidium bromide staining. Bacterial gDNA was used as substrate for REase reactions. Expression of the Efm733 gene EFSG\_00659 in *E. coli* STBL4 protects *E. coli* gDNA from Agel digestion. EcoRI is a positive control for digestion. -, no enzyme added.
